# Supplementary material for: The direct decomposition of NO into N2 and O2 over copper doped Ba3Y4O9
Source: Royal Society of Chemistry journal article supplement (doi:10.1039/d0cy00194e), 2020-01-01
Supplement: d0cy00194e1.pdf [file d0cy00194e1.pdf]

## Electronic Supplementary Information

### Direct decomposition of NO into N<sub>2</sub> and O<sub>2</sub> over copper doped Ba<sub>3</sub>Y<sub>4</sub>O<sub>9</sub>

Siman Fang<sup>a</sup>, Atsushi Takagaki<sup>b</sup>, Motonori Watanabe<sup>c</sup> and Tatsumi Ishihara<sup>a, b, c\*</sup>

<sup>a</sup> Department of Automotive Science, Kyushu University, Motooka 744, Nishi-ku, Fukuoka, 819-0395, Japan

<sup>b</sup> Department of Materials Science and Engineering, Kyushu University, Motooka 744, Nishi-ku, Fukuoka, 819-0395, Japan

<sup>c</sup> International Institute for Carbon Neutral Energy Research (WPI-I<sup>2</sup>CNER), Kyushu University, Motooka 744, Nishi-ku, Fukuoka, 819-0395, Japan

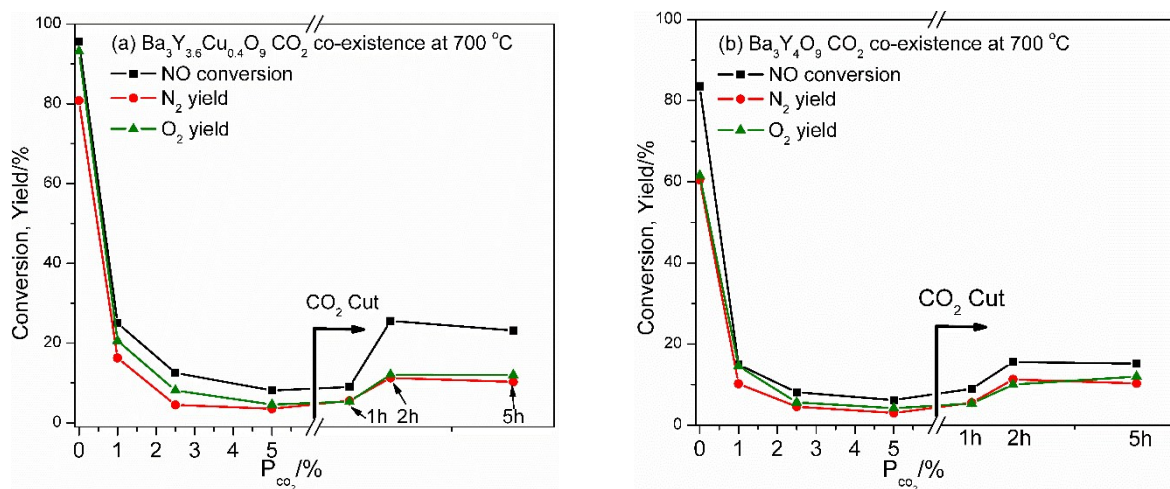

Fig. S1 NO decomposition activities over (a) Ba<sub>3</sub>Y<sub>3.6</sub>Cu<sub>0.4</sub>O<sub>9</sub> and (b) Ba<sub>3</sub>Y<sub>4</sub>O<sub>9</sub> with different partial pressure of CO<sub>2</sub> at 700 °C (P<sub>NO</sub> = 0.5%, W/F = 3.0 g<sub>cat</sub> s cm<sup>-3</sup>)

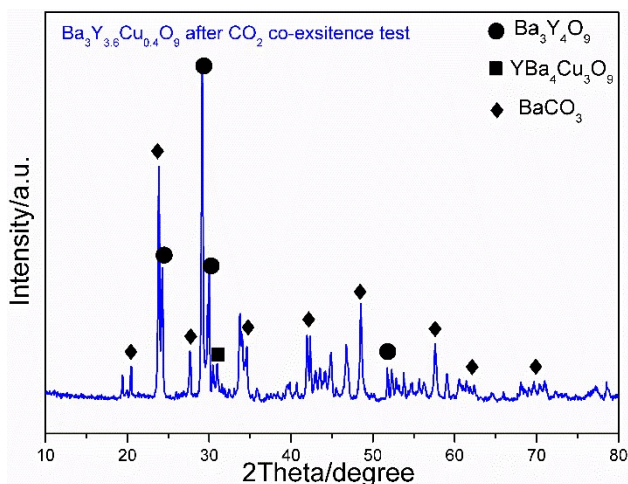

Fig. S2 XRD patterns of Ba<sub>3</sub>Y<sub>3.6</sub>Cu<sub>0.4</sub>O<sub>9</sub> before and after NO decomposition with CO<sub>2</sub>
